# Supplementary material
Source: Springer Nature journal article supplement (https://www.springermedizin.de/resource/supplementary/13054_2010_8830_MOESM2_ESM.pdf/9732670)

Mean rank

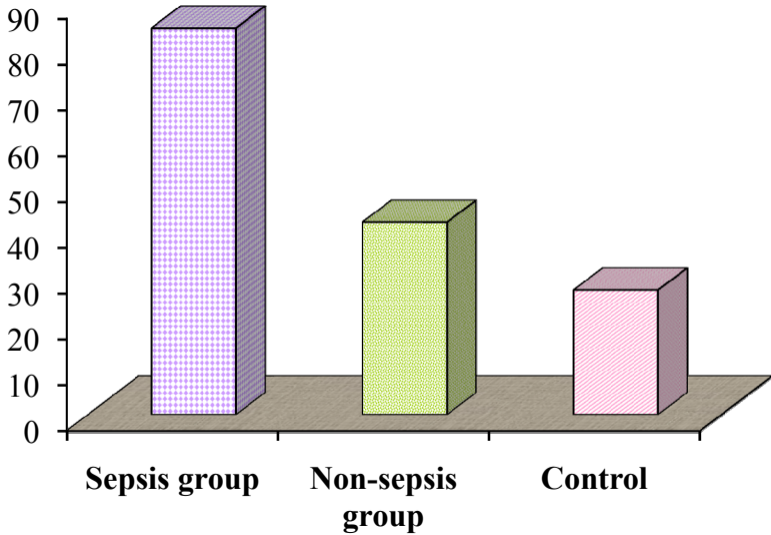

Supplement: MOESM2 [file 9732670]
